1 **Impact of a multi-pronged cholera intervention in an endemic setting**

2 Short title: Short-term impact of OCV and WASH in a cholera endemic area

3 Alexandre Blake<sup>1</sup>, Adam Walder<sup>2</sup>, Ephraim Hanks<sup>2</sup>, Placide Okitayembo Welo<sup>3</sup>, Francisco Luquero<sup>4</sup>, Didier  
4 Bompangue<sup>3,5</sup>, Nita Bharti<sup>1</sup>

5 Corresponding author: Alexandre Blake, [agb163@psu.edu](mailto:agb163@psu.edu)

6

7 1: Biology Department, Center for Infectious Disease Dynamics, Penn State University, University Park,  
8 Pennsylvania, United States of America

9 2: Statistics Department, Center for Infectious Disease Dynamics, Penn State University, University Park,  
10 Pennsylvania, United States of America

11 3: Programme National d'Élimination du Choléra et de lutte contre les autres Maladies Diarrhéiques,  
12 Kinshasa, Democratic Republic of the Congo

13 4: Epicentre, Paris, France

14 5: Department of Ecology and Control of Infectious Diseases, Faculty of Medicine, University of Kinshasa,  
15 Kinshasa, Democratic Republic of the Congo

16

17 **Abstract**

18 Cholera is a bacterial water-borne diarrheal disease transmitted via the fecal-oral route that causes high  
19 morbidity in sub-Saharan Africa and Asia. It is preventable with vaccination, and Water, Sanitation, and  
20 Hygiene (WASH) improvements. However, the impact of vaccination in endemic settings remains  
21 unclear. Cholera is endemic in the city of Kalemie, on the shore of Lake Tanganyika, in the Democratic

22 Republic of Congo, where both seasonal mobility and the lake, a potential environmental reservoir, may  
23 promote transmission. Kalemie received a vaccination campaign and WASH improvements in 2013-  
24 2016. We assessed the impact of this intervention to inform future control strategies in endemic  
25 settings.

26 We fit compartmental models considering seasonal mobility and environmentally-based transmission.  
27 We estimated the number of cases the intervention avoided, and the relative contributions of the  
28 elements promoting local cholera transmission.

29 We estimated the intervention avoided 5,259 cases (95% credible interval: 1,576.6-11,337.8) over 118  
30 weeks. Transmission did not rely on seasonal mobility and was primarily environmentally-driven.

31 Removing environmental exposure or contamination could control local transmission.

32 Repeated environmental exposure could maintain high population immunity and decrease the impact of  
33 vaccination in similar endemic areas. Addressing environmental exposure and contamination should be  
34 the primary target of interventions in such settings.

35

## 36 **Author summary**

37 Cholera is a major global health concern that causes high morbidity. It is a bacterial water-borne disease  
38 that can be transmitted via the fecal-oral route or the ingestion of contaminated water. Hence, both  
39 population mobility and environmental exposure can promote cholera persistence. The primary tools to  
40 prevent cholera include vaccination and Water, Sanitation, and Hygiene (WASH) improvements. The  
41 effectiveness of these interventions is well understood in epidemic settings, but their impact in endemic  
42 settings is unclear. Achieving cholera elimination requires disentangling the contributors to  
43 transmission, specifically population mobility and aquatic reservoirs, and assessing the impact of  
44 interventions performed in endemic settings.

45 This study focuses on Kalemie, a cholera endemic city in the Democratic Republic of Congo, on shore of  
46 a lake that serves as a potential environmental reservoir. It quantifies the short-term impact of an  
47 intervention that used targeted vaccination and WASH. The study shows that the impact of vaccination  
48 was dampened by very high background immunity due to constant environmental exposure. This  
49 suggests that WASH improvements should be the primary intervention in such settings despite the time-  
50 and resource-intensive nature of implementation.

51

## 52 **Introduction**

53 Cholera is a bacterial water-borne diarrheal disease transmitted through the fecal-oral route. Since the  
54 beginning of the 7th cholera pandemic, cholera has been endemic in sub-Saharan Africa (SSA) (1) which  
55 now experiences the highest morbidity and mortality globally (2), excluding major epidemic events that  
56 occurred in Haiti and Yemen. Typical cholera symptoms include vomiting and diarrhea with rice-water  
57 stools, potentially leading to severe dehydration. Individual symptoms can range from asymptomatic  
58 infections, to mild infections with symptoms that are hardly distinguishable from other diarrheal  
59 diseases, to the typical severe watery diarrhea (3). The case fatality rate (CFR) can reach 70% among  
60 severe cases without appropriate treatment, mainly rehydration (4). As many as 80% of infections can  
61 be asymptomatic in endemic areas (4), resulting in underestimates of cholera burden.

62 Cholera's causal agent, *Vibrio cholerae* (*V. cholerae*), specifically serogroups O1 and O139, survives in  
63 aquatic environments and is present in the excreta (stools and vomit) of infected individuals. Infection is  
64 acquired by ingesting a sufficient bacterial load from the environment (indirect transmission), or contact  
65 with infectious excreta (direct transmission). *V. cholerae* abundance in aquatic reservoirs varies through  
66 interactions with biotic and abiotic factors. Elements of aquatic flora and fauna are associated with *V.*  
67 *cholerae* abundance (5). Concomitantly, environmental parameters including water temperature and

68 salinity also influence the *V. cholerae* life cycle in its aquatic reservoir (6,7). Viable *V. cholerae* can persist  
69 in the environment in suboptimal conditions for over 15 months in a non-culturable state (5), from  
70 which it can revert to a culturable state in favorable conditions. Inappropriate waste management can  
71 introduce *V. cholerae* in natural or manmade water reservoirs (8,9) and trigger outbreaks through  
72 consumption of contaminated water. An outbreak can then be fueled by both direct and indirect  
73 transmission as the increased prevalence of the infection can result in contamination of additional water  
74 reservoirs. The dominant transmission routes can be hard to disentangle but their identification is  
75 critical to control cholera.

76 The Global Task Force on Cholera Control (GTFCC) has set a road map to eliminate cholera in 20 endemic  
77 countries by 2030 (10), defining SSA as an important target. Generally, diseases or pathogens are  
78 considered endemic in an area when they display persistent local transmission for an extended period of  
79 time. For cholera, the World Health Organization (WHO) defines an area as endemic when local  
80 transmission caused confirmed cases in the previous three years (10). This definition encompasses a  
81 wide variety of transmission patterns, which could cause the same intervention to have different  
82 impacts in different endemic areas. In non-endemic areas, the environmental contribution to cholera  
83 transmission is often low, but in endemic areas the relative contribution of direct and indirect  
84 transmission routes is often unknown. The benefits expected from cholera interventions, as traditionally  
85 implemented in outbreak response, become less clear in endemic settings because they do not  
86 necessarily target the dominant transmission route.

87 Cholera transmission can be prevented by improving water and sanitation infrastructures and with  
88 vaccination. Water, sanitation, and hygiene (WASH) improvements have historically been the primary  
89 prevention tool. WASH improvements are resource- and time-intensive to implement (11). They are  
90 extremely effective; waste management and water infrastructures have largely prevented cholera  
91 transmission in high income countries (12). Large scale WASH improvements are necessary to control

92 cholera (13), however resource scarcities limit such improvements in the countries carrying most of the  
93 global burden: SSA nations have some of the poorest access to clean water and improved toilets in the  
94 world (14). In comparison, implementing a vaccination campaign is fast and can reduce cholera  
95 transmission quickly. The empirical results of the reactive use of oral cholera vaccines (OCV) in 2012 in  
96 Guinea and theoretical results from modeling studies demonstrated the utility of vaccination as a tool to  
97 control cholera (15,16). A quick vaccine rollout leads to a rapid increase in population immunity that can  
98 mitigate cholera transmission, but it is a short term solution because the acquired protection declines  
99 after about 2-3 years (17). The increasing stockpile of OCV allowed for more frequent use of vaccines in  
100 outbreak response and its novel use in endemic areas (18,19).

101 Both OCV and WASH improvements are important components of the multisectoral interventions  
102 required to control cholera in areas with high burden (10,19). While the benefit of OCV is  
103 straightforward in epidemic settings (20,21), it might be narrow in an endemic setting. The impact of  
104 OCV on transmission correlates with the increase in population immunity but immunity may always be  
105 high if cholera exposure is frequent and widespread, which can be the case in endemic settings.  
106 Quantifying the impact of interventions using OCV in endemic settings could provide valuable  
107 information to inform control strategies and achieve the ambitious goals set by the GTFCC.

108 The Democratic Republic of Congo (DRC) has consistently carried one of the highest cholera burdens in  
109 the African Great Lakes region (2). Cholera is endemic in the Congolese city of Kalemie, in Tanganyika  
110 Province, which lies on the shore of Lake Tanganyika (Figure 1A and Figure 1B). The area displays annual  
111 peaks of cholera cases, typically during rainy seasons (Figure 1C), and reports suspected cholera cases all  
112 year. Lake Tanganyika could act as an environmental reservoir providing frequent exposure. In parallel,  
113 the local population is highly mobile with 24.7% of the residents of Tanganyika Province reporting  
114 travelling at least once in the previous 12 months for a duration of at least 1 month (22). The strong  
115 fishing activity, with fishermen moving seasonally and experiencing exposure to the lake and low

116 sanitation conditions, may be a potential source of reintroduction (23). Such mobility could also  
117 promote cholera persistence through metapopulation dynamics.

118 The city of Kalemie received a cholera intervention in 2013-2016 that included both an OCV campaign  
119 and limited WASH improvements. The health system in DRC is organized around nested geographical  
120 units: Provinces, health zones (HZ), and health areas (HA). Public health interventions are often  
121 organized and implemented at least at HZ level. The city of Kalemie spreads across two HZ, Kalemie and  
122 Nyemba (Figure 1B). The vaccination campaign targeted HA that were in Kalemie city, where attack  
123 rates had historically been the highest as of November 2013. The vaccination campaign originally  
124 targeted about 120,000 people in four HA with two doses of Shanchol™, but was interrupted after three  
125 days due to security issues. It resumed in July 2014 and the expiration of vaccine doses led to reducing  
126 the target population to about 52,000 people in two HA. Ultimately, 81.2% of the target population  
127 received at least one dose (24). The WASH component of the intervention focused on improving access  
128 to clean water. Although it was not acting on every dimension of WASH, we simply refer to it as “WASH  
129 intervention” below. Doctors Without Borders (*Médecins Sans Frontières*, MSF) extended access to tap  
130 water in the northern part of the city by laying pipes, building water reservoirs, distributing water filters,  
131 and setting up public drinking fountains in collaboration with *Solidarites International*. In addition, sand  
132 filters were installed on paths where people draw water from the lake, and chlorination activities were  
133 performed during outbreaks. The WASH intervention incurred delays in the aftermath of the security  
134 issue that delayed the OCV intervention. Its first milestone, extending access to tap water was achieved  
135 in October 2014 and the remaining components were completed incrementally until early 2016.

136 We fit a group of deterministic compartmental models that included interhuman cholera transmission  
137 with and without environmental contribution and seasonal migration. We used the model with the best  
138 fit to assess the short-term impact of this multi-pronged intervention in the city of Kalemie while

139 considering the potential influence of environmental drivers and their contributions to local  
140 transmission.  
141

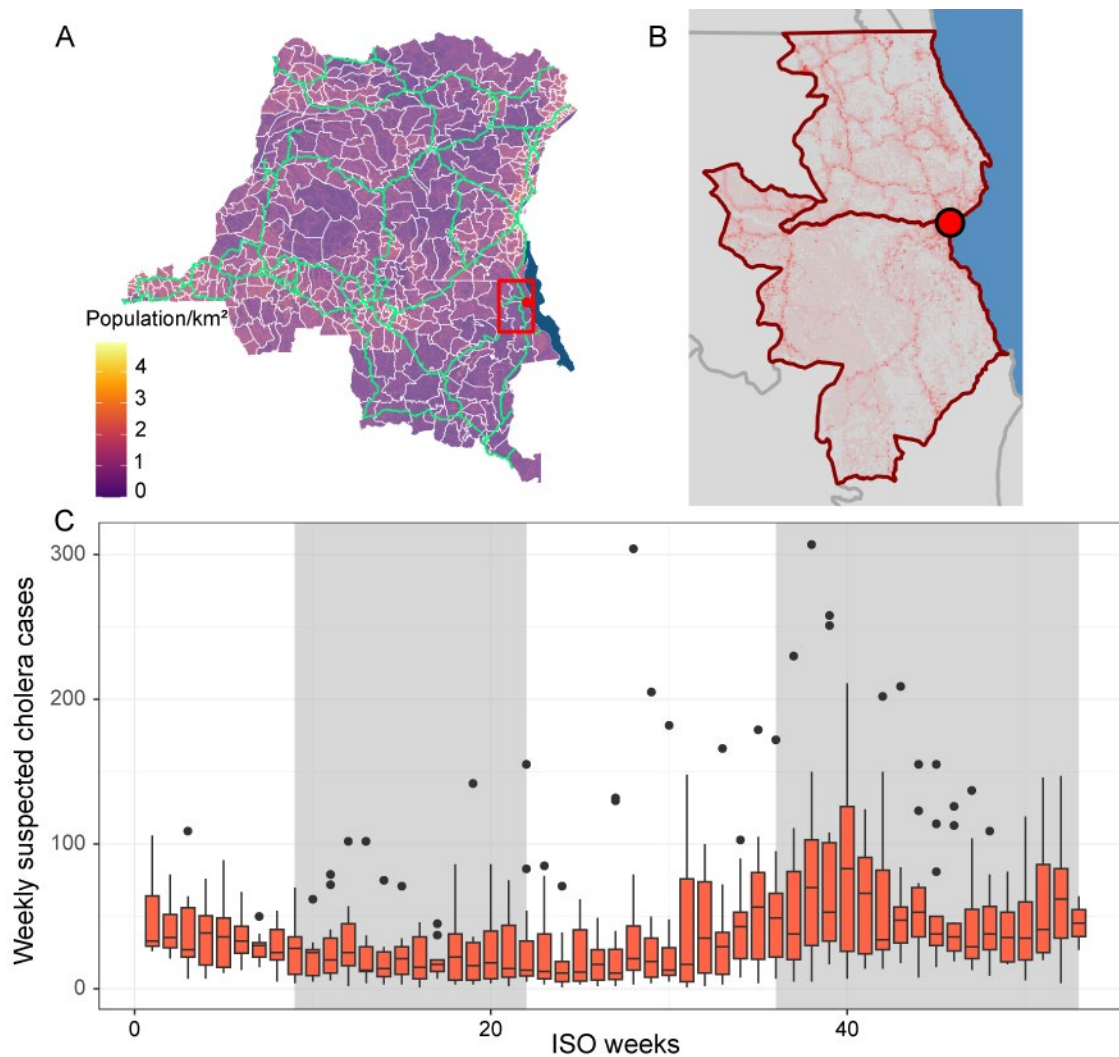

142  
143 **Figure 1:** Overview of the location and the seasonality of cholera cases in the study area. (A) Map of the DRC with  
144 population density (log transformed), boundaries of health zones in white, major roads in light green, a red box around  
145 the health zones of Kalemie and Nyemba. (B) Detail of red box from A, red circle on Kalemie city, Lake Tanganyika  
146 in blue. Low population density in grey, high in red. Health zones of Kalemie and Nyemba outlined in dark red. (C)  
147 Weekly number of reported suspected cholera cases (based on the International Organization for Standardization (ISO)

148 system) in the health zones of Kalemie and Nyemba from 2002 to 2014 (25), typical rainy season weeks shaded in  
149 grey.

150

## 151 **Methods**

152 We fit a group of Susceptible-Infected-Recovered-Susceptible models with a compartment, B, for the  
153 bacterial population in the environmental reservoir (SIRB), Lake Tanganyika (26). We explored the  
154 influence of seasonal migration on cholera transmission by fitting models with different structures: with  
155 both susceptible and infected (in bold in equations 1, 2, 5, and 6 below), or only susceptible individuals  
156 migrating, or no migration.

157 We fit the SIRB models to the reported suspected cholera cases presenting at the only cholera  
158 treatment center in the city of Kalemie from November 2013 to February 2016. For this period of time  
159 only, detailed surveillance data were gathered in an electronic register with support from MSF as part of  
160 a study to assess the impact of the intervention. Only residents of the city of Kalemie were included in  
161 the analysis.

162 The structure of the full model is as follows:

$$163 \quad \frac{dS}{dt} = \delta R - \beta_h \frac{SI}{N} - \beta_e \frac{B}{\kappa+B} (1 + \lambda_e f(\text{rain}_t)) S - \eta S + \mathbf{f}_S(\mathbf{rad}_t) \quad (1)$$

$$164 \quad \frac{dI}{dt} = \beta_h \frac{SI}{N} + \beta_e \frac{B}{\kappa+B} (1 + \lambda_e f(\text{rain}_t)) S - \gamma I + \mathbf{f}_I(\mathbf{rad}_t) \quad (2)$$

$$165 \quad \frac{dR}{dt} = \gamma I - \delta R + \eta S \quad (3)$$

$$166 \quad \frac{dB}{dt} = \mu (1 + \lambda_c f(\text{rain}_t)) I - B(\varepsilon - \varphi_t) \quad (4)$$

167 with

$$168 \quad \mathbf{f}_S(\mathbf{rad}_t) = \alpha_1 \mathbf{rad}_t \quad (5)$$



169  $f_I(rad_t) = \alpha_I rad_t$  (6)

170  $ratio_{S/I} = \frac{\alpha_1}{\alpha_I}$  (7)

171  $\varphi_t = e^{\alpha_2 + \alpha_3 sst_t + \alpha_4 chlor_t}$  (8)

172  $\eta = (\sigma_1 VC_{1t} + \sigma_2 VC_{2t})\theta$  (9)

173  $f(rain_t) = \frac{rain_t}{max(rain_t)}$  (10)

174 Susceptible individuals become infected through exposure to the environmental reservoir,  $\beta_e$ , or  
175 through interhuman transmission,  $\beta_h$ . The WASH intervention decreased the environmental exposure  
176 rate  $\beta_e$  to  $\beta_e - \beta_{WASH}$  by the end of the study period.  $\beta_e$  was assumed to decrease linearly from  $\beta_e$  to  $\beta_e -$   
177  $\beta_{WASH}$  from the time the first component of the WASH improvements was completed (ISO week 40 in  
178 2014). The model did not allow the environmental contamination to vary because the intervention did  
179 not target waste management. The infection probability from an exposure to the environment followed  
180 a dose-effect relationship, with the half saturation constant  $\kappa$ . Infected individuals transitioned to the  
181 recovered compartment at rate  $\gamma$ . Susceptible individuals could gain immunity through vaccination,  $\eta$ , 1  
182 week after receiving the vaccine (15). This was included through a step function of the number of people  
183 who received 1 or 2 doses ( $VC_{1t}$  and  $VC_{2t}$ ) of Shanchol™. We estimated the number of vaccinated  
184 individuals from vaccine coverage estimates from a survey performed by MSF (24) and the associated  
185 population size estimates (see Supplementary information (SI)). We considered a range of values for  
186 vaccine effectiveness for one and two dose regimens ( $\sigma_1$  and  $\sigma_2$ ), including estimates from studies done  
187 in the aftermath of reactive vaccination campaigns performed in Zambia and Guinea (15,27) (see SI).  
188 Our models assumed an all-or-nothing effect of vaccination, implying optimistic estimates of its impact,  
189 but we also fit an alternative model structure with a leaky vaccine as sensitivity analysis (see SI).  
190 Considering the wide age range of the target population (everyone older than 1 year), we assumed that

191 the proportions of susceptible, infected, and recovered among the vaccinated individuals were the same  
192 as the general population when the doses were distributed. Immunity waned at rate  $\delta$ , returning  
193 immune individuals to the susceptible compartment. We did not include booster effects on immune  
194 individuals receiving vaccine. Booster effects are unlikely to be detected in the study period of 118  
195 weeks (most doses were distributed on the 32<sup>nd</sup> and 35<sup>th</sup> week), because the study period is shorter  
196 than the average period of immunity, whether acquired through infection or vaccination (28,29). We  
197 also assumed that vaccination had no impact on those who were infected at the time of vaccination. We  
198 added a penalty term ( $\Theta$ ) to account for the spatially targeted nature of the vaccination campaign,  
199 which focused on HA in the city of Kalemie with historically high attack rates, where residents had  
200 experienced more cholera exposure, further decreasing the proportion of susceptibles. We considered a  
201 range of possible values for  $\Theta$  (between 0.7 and 1) (see SI).

202 Population size was allowed to vary through seasonal migration ( $f_S(rad_t)$  and  $f_I(rad_t)$ ), which can  
203 influence local cholera transmission through regular reintroductions from areas with ongoing  
204 transmission. We included migration by quantifying the seasonal variation of contemporaneous  
205 anthropogenic nighttime radiance, extracted from Visible Infrared Imaging Radiometer Suite (VIIRS) data  
206 (30) (see SI). We assumed that the net migration flow varied linearly with the first derivative of the  
207 nighttime radiance data in the area ( $rad_t$ ) (31). We first fit a generalized additive model with a cyclical  
208 spline to the radiance data and then extracted its first derivative (see SI). We did not consider the  
209 mobility of immune individuals, because they do not actively contribute to transmission. We considered  
210 a range of values for the ratio of susceptible and infectious individuals among the mobile population  
211 ( $ratio_{S/I}$ ) (between 10 and 100) (see SI). We explored alternative model structures allowing only  
212 susceptible individuals to be mobile ( $f_I(rad_t) = 0$ ) or removing seasonal mobility ( $f_S(rad_t) = 0$  and  
213  $f_I(rad_t) = 0$ ) (see SI).

214 We considered the influence of water temperature, with lake surface temperature ( $SST_t$ ), and  
215 phytoplankton, with chlorophyll-a ( $chlor_t$ ), as environmental drivers on aquatic bacterial growth (5). We  
216 extracted these values from Moderate Resolution Imaging Spectroradiometer data (32) (see SI).  
217 Precipitation ( $rain_t$ ) could also increase exposure to environmental reservoir and its contamination with  
218 infectious human excreta by respectively contaminating drinking water sources (33) ( $\lambda_{ef}(rain_t)$ ) and  
219 flooding defecation sites ( $\lambda_{cf}(rain_t)$ ). We extracted precipitation estimates from meteorological  
220 forcing data (34).

221 The bacterial population in the environment increased with contamination of the lake from the excreta  
222 of infected individuals ( $\mu$ ), and a time dependent bacterial growth rate ( $\varphi_t$ ) that varied with  $SST_t$  and  
223  $chlor_t$ . Conversely, it decreased through constant bacterial decay ( $\varepsilon$ ).

224 The models did not include births, deaths, or the age structure of the host population because of the  
225 short study period of 118 weeks. Based on case management and a CFR of 0.3% during this 118 week-  
226 period (5 deaths reported among the 1634 resident suspected cholera cases), we did not include cholera  
227 specific mortality.

228 We used a negative binomial process to link the predicted number of weekly incident cases ( $C_t$ ) and the  
229 weekly reported suspected cases ( $A_t$ ):  $A_t \sim NegBinom(C_t r, C_t \psi)$ , with  $r$ , a combination of reporting  
230 rate and the portion of true cases captured by the suspected case definition (see SI), assumed constant,  
231 and  $C_t \psi$ , an overdispersion parameter scaling with the predicted number of new cases. The negative  
232 binomial distribution can handle overdispersion and its scaling overdispersion parameter allows  
233 variance estimates to better scale with fast and large variations of the incidence.

234 Using different assumptions regarding  $ratio_{SI}$ ,  $\sigma_1$ ,  $\sigma_2$ , and  $\theta$ , we fit a group of 96 models: 64 variations  
235 of the full model, 16 variations of the model with only susceptible individuals migrating, and 16  
236 variations of the model without seasonal migration (see SI). We assessed model fit with the widely

237 applicable information criteria (WAIC) (35) and selected the best performing model presented here with  
238 the lowest WAIC or with fewer parameters for similar WAIC. We also performed a sensitivity analysis of  
239 the best performing model by removing the possibility for bacterial growth ( $\varphi_t = 0$ ) or the  
240 environmental compartment and indirect transmission ( $\beta_e = 0$ ) (see SI).

241 We estimated the parameters  $\beta_h, \beta_e, \beta_{WASH}, \alpha_1, \alpha_2, \alpha_3, \alpha_4, \lambda_e, \lambda_c, \delta, \mu, \varepsilon, r$ , and  $\psi$ , and the initial  
242 conditions  $S_0, I_0, B_0$  through Markov chain Monte Carlo sampling using the Metropolis-Hastings  
243 algorithm. All the estimates presented are the mean values over the posterior distribution and their 95%  
244 credible interval (95% CrI) using the highest density interval.

245 We assessed the short-term impact of each arm of the intervention separately and both arms together  
246 by estimating the number of additional cases in their absence. We fixed  $\eta$  to 0 while keeping  $\beta_{WASH}$   
247 unchanged, simulating WASH improvements without vaccination, did not allow  $\beta_e$  to decrease  
248 ( $\beta_{WASH}=0$ ) while keeping  $\eta$  unchanged, simulating vaccination without WASH improvements, and then  
249 fixed both  $\eta$  and  $\beta_{WASH}$  to 0, simulating no vaccination and no WASH improvements. We sampled  
250 10,000 sets of parameters from the posterior distribution and calculated the number of additional cases  
251 in each of the alternative scenarios compared to the intervention as it happened.

252 We explored alternative vaccination strategies by varying the timing and the size of the target  
253 population, between 50,000 to 200,000 (19.0-76.1% of the population of the city of Kalemie), assuming  
254 one campaign during the 118-week period with a two-dose regimen (without WASH). The maximum  
255 target population size considered is within the MSF vaccination capacity observed in other settings (27).

256 We estimated the number of cases avoided for each scenario by calculating the reduction in cholera  
257 cases compared to no intervention for each of 10,000 set of parameters sampled from the posterior  
258 distribution. We considered 84 combinations of alternative timing and target population size. We  
259 sampled 500 sets of parameters for each combination, computational intensity prohibited more.

260 We investigated the relative contributions of environmental exposure and contamination to  
261 transmission assuming no intervention by simulating scenarios with no environmental exposure ( $\beta_e=0$ ),  
262 or no environmental contamination ( $\mu=0$ ) and calculating the number of additional cases compared to  
263 having them both ( $\beta_e$ , and  $\mu$  unchanged) for each of 10,000 sets of parameters sampled from the  
264 posterior distribution.

## 265 **Results**

266 Models with no seasonal migration had a comparable fit to the ones with only susceptible individuals  
267 migrating or seasonal migration of both susceptible and infected individuals (see SI). This suggested that  
268 mobility had minimal influence on the observed cholera dynamics. We selected the model with the  
269 lowest WAIC among the ones without seasonal migration, which had fewer parameters. It reproduced  
270 the reported weekly cholera cases well, with 98.3% (116/118) of the observed data in the model  
271 prediction's envelope of the 95% CrI of weekly reported suspected cases (Figure 2A). The model  
272 suggested high local immunity, fluctuating between 88.8% and 99.9% (Figure 2B). This high immunity  
273 would be the likely consequence of annual outbreaks and persistent environmental exposure, which we  
274 explain further below. Based on our model, the targeted vaccinations occurred when population  
275 immunity was high: 97.8% (95% CrI: 96.7-98.6) in November 2013, 89.0% (95% CrI: 76.7-96.7) in July  
276 2014, and 89.1% (95% CrI: 77.2-96.6) during the catch-up in August 2014.

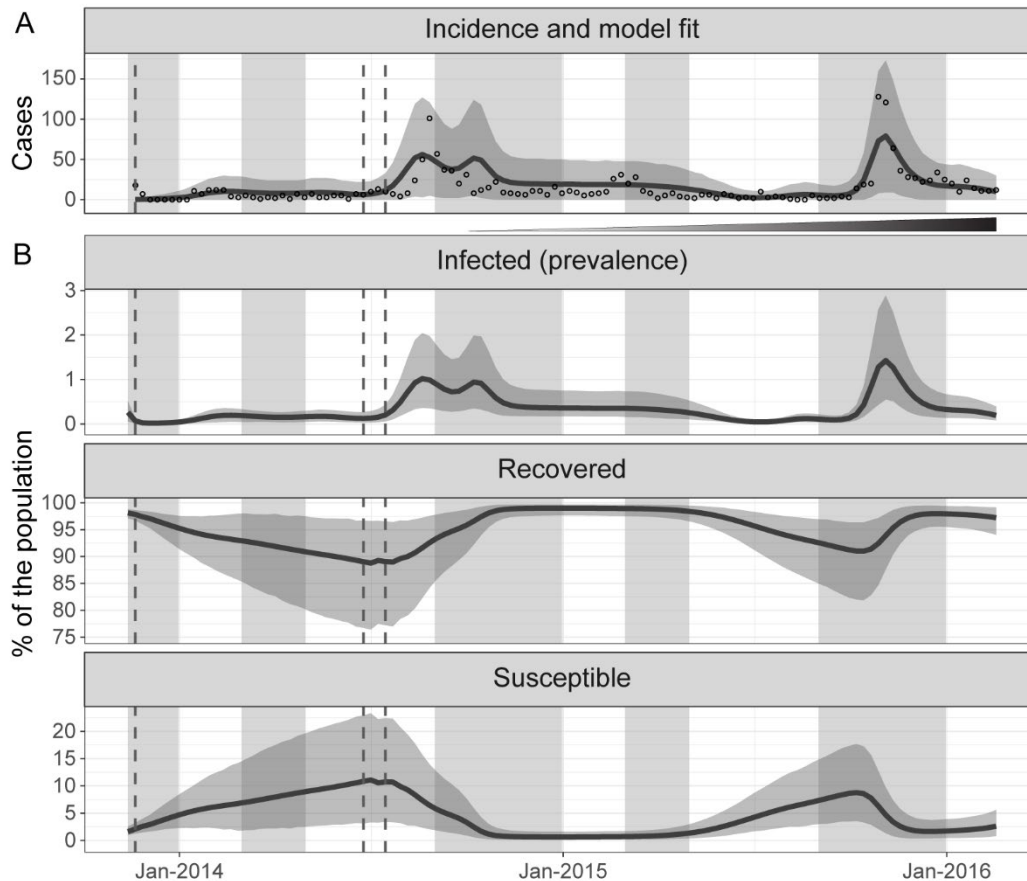

277

278 **Figure 2:** Incident cases, model fit, and variation of the percentage of infected, recovered, and susceptible over time.

279 (A) Weekly reported suspected cholera cases residing in the city of Kalemie (empty circles) from November 2013 to

280 February 2016 and mean model prediction of the reported weekly cholera cases (dark line) and its 95% credible

281 interval (grey envelope) (B) Mean model prediction of the percent of the population infected (prevalence), recovered,

282 and susceptible (dark lines) and their 95% credible interval (grey envelopes) from November 2013 to February 2016.

283 Typical rainy seasons are shaded in grey, the timing of the distribution of vaccine doses in vertical dashed grey lines,

284 and the incremental implementation of the improvements in water and sanitation is indicated by the widening and

285 darkening triangle between A and B.

286

287 Both the scenarios omitting vaccination (WASH only, and no WASH and no vaccination) visibly lacked a

288 reduction in the susceptible proportion of the population in July 2014 (Figure 3A, bottom panel). Over

289 this 118 week period, we estimated: 3,702 (mean: 3,702.3, 95% CrI: 1,302.5-7,542.0) additional cases  
290 when removing vaccination alone (scenario with WASH only), 1,585 (mean: 1,585.5, 95% CrI: 1,321.9-  
291 5,108.8) cases avoided by WASH alone (scenario with vaccination only), and 5,259 (mean: 5,258.6, 95%  
292 CrI: 1,576.6-11,337.8) cases avoided by implementing both vaccination and WASH (scenario with no  
293 vaccination and no WASH improvements) (Figure 3B).

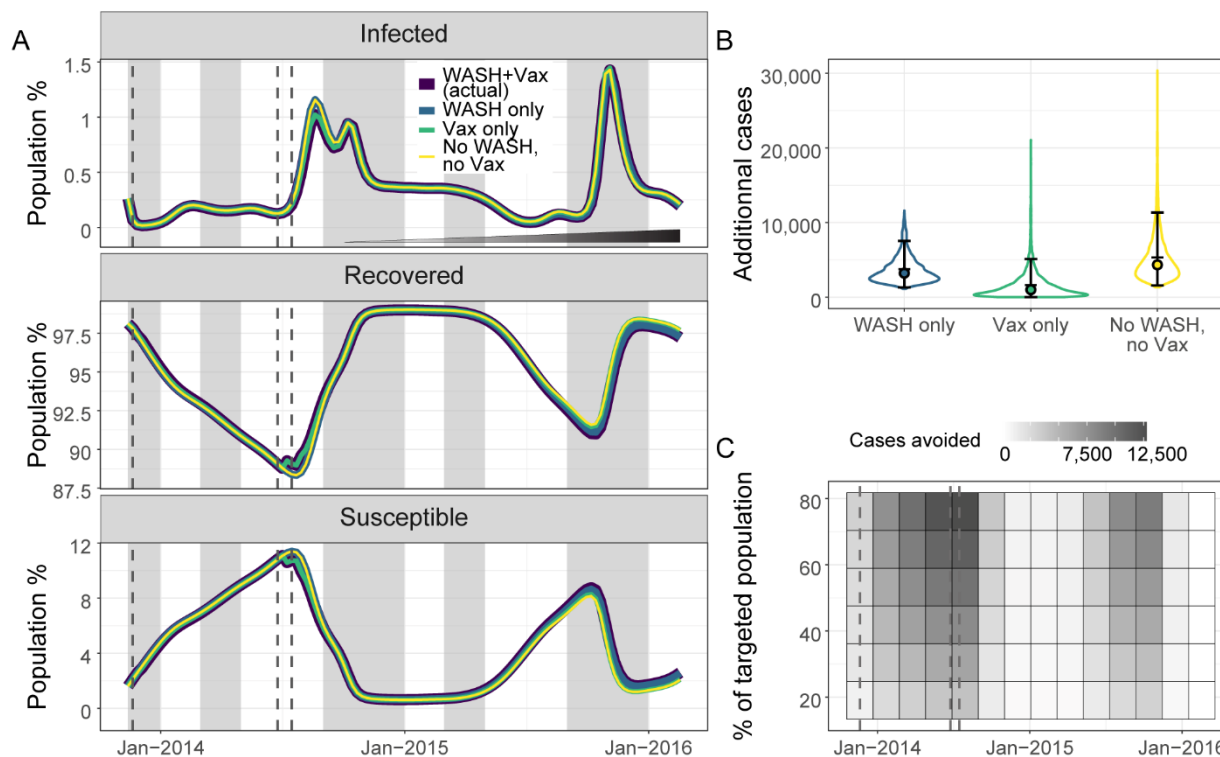

294  
295 **Figure 3:** Estimated impact of the components of the intervention and impact of alternative vaccination strategies.  
296 (A) Mean model predictions of the percentage of infected, recovered, and susceptible in the population considering:  
297 the intervention as it happened of WASH and vaccination (dark blue), WASH only (blue), vaccination only (green),  
298 and no intervention of either WASH or vaccination (yellow) from November 2013 to February 2016. The incremental  
299 implementation of the improvements in water and sanitation is indicated by the widening and darkening triangle in  
300 the top panel. Typical rainy seasons are shaded in grey and the timing of the distribution of vaccine doses is shown in  
301 dashed grey lines. (B) Violin plots of numbers of additional cholera cases at the end of the study period with WASH  
302 only (blue), vaccination only (green), or no intervention (no WASH and no vaccination) (yellow) compared to the  
303 intervention as it happened of WASH and vaccination. The error bars, the filled circles, and the horizontal bars indicate

304 the 95% credible interval, the medians, and the means respectively. (C) Heatmap of the mean number of cases avoided  
305 by changing the timing and the coverage of a vaccination campaign compared to a scenario without intervention. The  
306 timing of the distribution of vaccine doses for the intervention as it happened is indicated by dashed grey lines.

307  
308 Our model suggested that vaccination campaigns with small target population sizes would have a limited  
309 impact in populations with high immunity (Figure 3C). However, the timing of a pulse of vaccination  
310 could substantially influence the impact of vaccination campaigns. Specifically, timing the vaccination to  
311 occur at the lowest point of population immunity and before an outbreak began increased its impact.  
312 The best performing vaccination scenario (darkest cell of the heatmap in Figure 3C) avoided 12,777  
313 cases (mean: 12,776.7, 95%CrI: 4,681.0-26,019.5) over 118 weeks for 200,000 vaccinated people.  
314 However, the high level of local immunity would result in vaccinating a large proportion of immune  
315 individuals, reducing the impact of the vaccination.

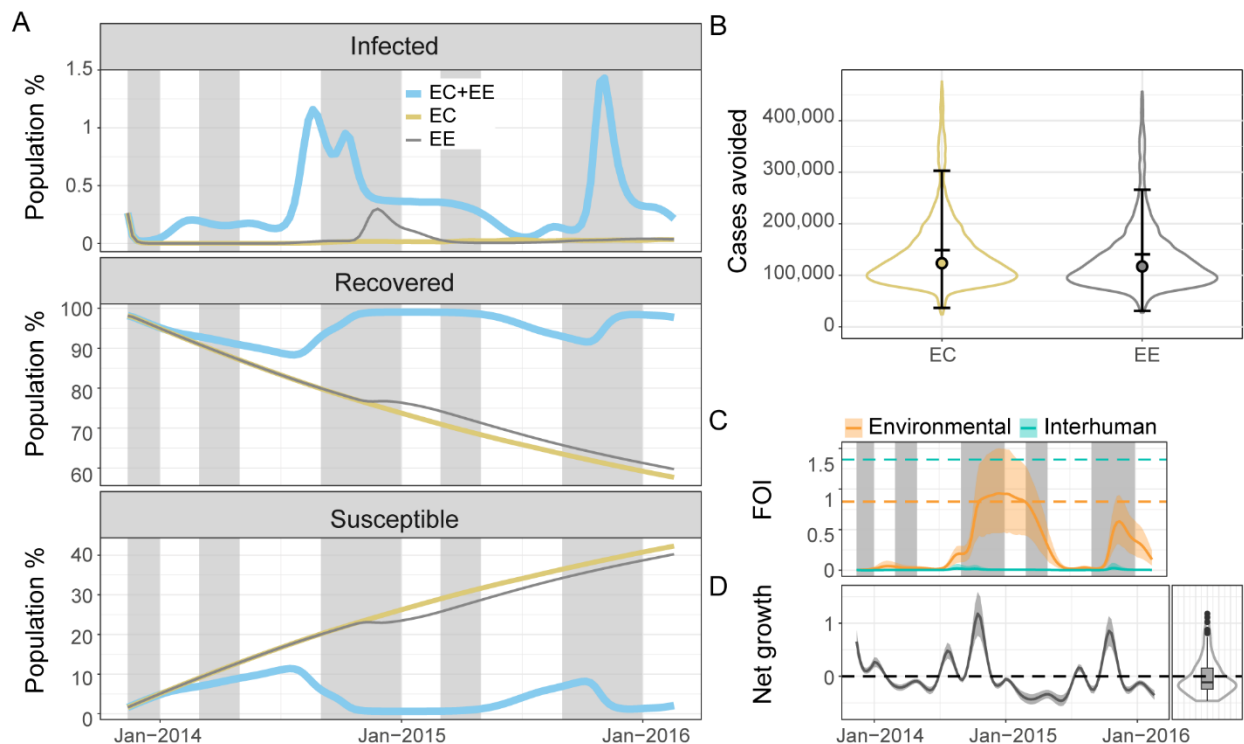

316



317 **Figure 4:** Contributions of the environmental reservoir in cholera transmission. (A) Mean model predictions of the  
318 percentage of infected, recovered, and susceptible individuals in the population with environmental contamination  
319 and exposure (EC+EE) (light blue), environmental contamination only (no environmental exposure) (EC) (beige), and  
320 environmental exposure only (no environmental contamination) (EE) (grey) from November 2013 to February 2016.  
321 Typical rainy seasons are shaded in grey. (B) Violin plots of numbers of cholera cases avoided by the end of the study  
322 period with only EC (beige), or only EE (grey) compared to a scenario with EC and EE. The error bars, the filled  
323 circles, and the horizontal bars indicate the 95% credible interval, the medians, and the means respectively. All the  
324 scenarios considered in A and B assume that no intervention occurred. (C) Mean prediction of the variation of the  
325 environmental (light orange line) and interhuman (light green line) components of the force of infection and their 95%  
326 credible interval (light orange and light green envelopes) from November 2013 to February 2016. The light orange  
327 and light green dashed lines indicate the mean values of the environmental exposure rate ( $\beta_e$ ) and interhuman  
328 transmission rate ( $\beta_h$ ), respectively. (D) Left: Mean prediction of the variation of the environmental net bacterial  
329 growth ( $\varphi_t - \varepsilon$ ) (dark line) and its 95% credible interval (grey envelope) from November 2013 to February 2016.  
330 Right: Violin plot and boxplot of the distribution of the mean prediction of the net bacterial growth rate from  
331 November 2013 to February 2016. The dashed black line indicates 0: values below 0 show net decay and values above  
332 0 show net growth.

333

334 We estimated that removing environmental exposure or contamination would have a critical impact on  
335 cholera dynamics. These strategies avoided 142,518 cases (mean: 142,518.3, 95% CrI: 36,670.0-  
336 303,068.3) and 134,373 cases (mean:134,372.8, 95% CrI: 30,921.5-266,103.8), respectively. In each of  
337 these scenarios local cholera transmission was virtually interrupted (Figure 4A and B). Environmental  
338 contamination appeared necessary to maintain a bacterial load sufficient to support environmentally-  
339 driven transmission because the fluctuation of *V. cholerae* population averaged towards net decay  
340 (Figure 4D, right).

341 The high immunity inferred by the model was maintained through annual flare-ups and constant  
342 environmental exposure. The environmental component of the force of infection ( $\Phi_e = \beta_e \frac{B}{\kappa+B} (1 +$   
343  $\lambda_e f(rain_t))$ ) was consistently greater than the interhuman transmission component ( $\Phi_h = \frac{\beta_h I}{N}$ ) despite  
344  $\beta_h$  being greater than  $\beta_e$  (Figure 4C).  $\Phi_h$  remained low because epidemic flare-ups did not lead to a high  
345 prevalence of infection, the way they would in a mostly susceptible population. Conversely,  $\Phi_e$  strongly  
346 increased with pulses of net bacterial growth due to environmental drivers, despite an overall trend  
347 favoring net decay (Figure 4D left and right).

348

## 349 Discussion

350 Based on our model, the impact of the intervention performed in Kalemie was modest when measured  
351 by cases avoided, preventing an estimated 5,259 cases (mean: 5,258.6, 95% CrI: 1,576.6-11,337.8) for  
352 both intervention arms combined. The reduction of the target population size following the interruption  
353 of planned vaccination activities, the limited scale and the incremental implementation of the WASH  
354 improvements, and the high level of population immunity likely all contributed to mitigating the impact  
355 of the intervention.

356 Benefitting from vaccination in endemic cholera settings, as defined by WHO, requires an understanding  
357 of dominant local transmission routes. Our model suggests that the impact of vaccination is small in  
358 settings where an environmental reservoir provides constant exposure and maintains high immunity,  
359 despite an optimistic assumption of an all-or-nothing vaccine. However, endemicity is more nuanced  
360 than the current WHO definition suggests and OCV could still play an important role in some endemic  
361 settings. The inability to identify and target the susceptible individuals would lead to vaccinating a  
362 majority of immune individuals in this situation. Achieving very high vaccine coverage would immunize a  
363 greater number of susceptible individuals, but at the cost of giving many additional doses to immune

364 individuals. This cost could be reduced by targeting the age group most represented among susceptibles  
365 or by guiding vaccination with serosurveys. The age profile of the suspected cholera cases residing in  
366 Kalemie (median age of 15 years, and interquartile range (IQR) of 3-34 years) during this period would  
367 support restricting the maximum age of the target population to increase the impact of the vaccination  
368 campaign. However, defining a meaningful age group target would require high resolution historical  
369 epidemiological data, and those would only provide information on symptomatic cases, a portion of  
370 infected cases. Similarly, guiding vaccination efforts with serosurveys to target susceptibles would incur  
371 a substantial additional cost in addition to the difficulty of applying a binary interpretation to serosurvey  
372 results.

373 Our estimates of average immunity duration ( $1/\delta = 3.7$  years, 95% CrI: 1.8- 8.0 years) and the cumulative  
374 incidence converted into an average yearly incidence rate (24.1%, 95% CrI: 11.7-47.5) are consistent  
375 with current knowledge of post-infection immunity and other incidence rate estimates in another well  
376 studied cholera endemic area, Bangladesh. Challenge studies have demonstrated that immunity lasts at  
377 least 3 years after natural infection (36). National incidence rate in late 2015 in Bangladesh was  
378 estimated at 17.3% based on a representative survey and analyses of vibriocidal titres (37).

379 Our model suggests that a well-timed large-scale vaccination could improve the impact of vaccination in  
380 the city of Kalemie, potentially avoiding an average of 12,777 cases (95%CrI: 4,681.0-26,019.5) for  
381 200,000 vaccinated individuals. However, this requires implementing a large vaccination campaign with  
382 precise timing. It would be logistically challenging and costly to implement vaccination campaigns of this  
383 scale with very precise timing, dictated by the need to vaccinate when immunity is at its lowest and  
384 before environmental drivers trigger a pulse of force of infection. This approach would still achieve only  
385 short term and small-scale benefits. On the other hand, our findings suggest that WASH improvements  
386 on a scale large enough to prevent environmental exposure and contamination for the whole population  
387 could have a dramatic long-term impact. Although we estimated that the WASH improvements in

388 Kalemie prevented a modest number of cases, this is likely partially due to the short period of time  
389 considered to assess the impact of this part of the intervention. The main components of this WASH  
390 intervention consisted of extending the pipe network and building a water reservoir, and they were  
391 completed incrementally during the 118-week period. While extending access to the pipe network is an  
392 important step, it does not guarantee reliable and consistent access to chlorinated tap water (38). The  
393 magnitude of the improvements required to ensure both access to safe water and efficient waste  
394 management, not only in Kalemie but throughout the cholera-affected nation of DRC, appears immense  
395 but necessary to control cholera. Implementing WASH improvements should be considered a priority  
396 not only to control cholera, but also to prevent the transmission of other water-borne and fecal-oral  
397 pathogens that contribute to the disease burden in DRC (39). This approach will also help achieve the 6<sup>th</sup>  
398 goal of the Sustainable Development Goals (40), to ensure availability and sustainable management of  
399 water and sanitation for all, in a country where WASH improvements are critically needed (14).

400 Kalemie is not unique regarding a potentially strong environmental driver of cholera transmission.  
401 Substantial environmental contributions for cholera cases have been reported in Haiti and Zimbabwe,  
402 areas where the basic reproduction number was estimated to rely mostly on its environmental  
403 component (16). Environmental drivers are also important drivers in other endemic settings like  
404 Bangladesh and India, although they act differently: flooding in the early and late phase of the monsoon  
405 is strongly associated with higher cholera incidence (41), while the peak of the monsoon is associated  
406 with a cholera lull due the “dilution” of *V. cholerae* in its reservoir (42). Although mobility does not  
407 appear to be necessary for local cholera persistence in the city of Kalemie, movement could make  
408 Kalemie a source of cholera that can seed outbreaks in surrounding areas that lack an environmental  
409 source and where exposure is less frequent. The older ages of the suspected cholera cases residing  
410 outside of Kalemie (median age of 24.5 years, and IQR: 5.75-39.25 years) are consistent with lower  
411 exposure rates and source-sink dynamics.

412 Our estimates supporting a major role of environmentally driven transmission in Kalemie’s local cholera  
413 dynamics appear plausible. Sensitivity analysis showed that removing the environmental component or  
414 bacterial growth of the model significantly decreased its ability to fit the observed data (see SI).  
415 Confirming our estimates of population immunity and the dominant source of bacterial infection would  
416 require serological data and substantial microbiological monitoring of the lake water in the area.  
417 Evidence of environmental presence of toxigenic *V. cholerae* is scarce in the area. Extensive water  
418 sampling in Lake Tanganyika from October 22<sup>nd</sup> to 26<sup>th</sup> 2018 did not detect toxigenic *V. cholerae* (43).  
419 However, it was detected in ten environmental samples, in fish and water, also collected from Lake  
420 Tanganyika from October 2018 to March 2019 and there is some evidence of increased positive samples  
421 during rainy seasons in other environmental sampling studies (44–46).

422 We estimated that the natural variation of the *V. cholerae* population in the lake leans in favor of net  
423 decay. Previous modeling studies assumed bacterial growth rates to consistently be in favor of net  
424 decay, whether they varied over time or not (47,48). More recent studies considered the possibility for  
425 complex bacterial growth patterns but were entirely theoretical (49). Our model allowed environmental  
426 bacterial abundance to vary based on environmental inputs, leading to temporary switches to net  
427 bacterial growth. These were important in creating pulses of high environmentally-driven force of  
428 infection. Improving the quality of consumed water (reducing environmental exposure) had a large  
429 impact in our simulations and removing environmental contamination had an impact almost as large.  
430 The overall trend toward net bacterial decay in our model highlights that regularly replenishing local  
431 bacterial population through environmental contamination is potentially a critical component of local  
432 persistence. This emphasizes the potential compounded benefits of comprehensive improvements to  
433 sanitary infrastructures and access to clean water.

434 We did not consider cholera-induced mortality because of the low number of cholera-induced deaths in  
435 this population and the local experience in managing cholera infections. However, there is evidence that

436 a substantial portion of cholera mortality occurs in the community (50), so we cannot rule out that some  
437 cholera-induced mortality is not captured in the reported data. The lack of data on mortality in the  
438 community prevented us from estimating the number of deaths avoided by the intervention. Our model  
439 did not consider the booster effect of vaccination on already immune individuals. This could have led us  
440 to slightly underestimate the duration of immunity but it is unlikely to have substantial impact on our  
441 estimates considering the short study period (118 weeks) compared to our estimated average immunity  
442 period (3.7 years). We also assumed that immunity wanes at similar rates for susceptible individuals  
443 who were successfully vaccinated and following natural infection, but vaccine-induced immunity likely  
444 wanes faster (51). This would have little impact on our estimates considering the small proportion of  
445 susceptible individuals in the population when doses were distributed in our model as well as short  
446 study period (52).

447 We included the potential impact of the WASH intervention in a simplistic way, assuming a linear  
448 variation of the environmental transmission rate. In the absence of more detailed information, this  
449 method required the fewest additional assumptions. To estimate environmental drivers, we used  
450 measurements of chlorophyll-a and surface water temperature in the lake in addition to the influence of  
451 rain. The interactions between *V. cholerae* and other elements of its aquatic reservoir are only vaguely  
452 understood (5,53). We cannot assess how accurately we captured the main fluctuations of the  
453 environmental bacterial population in the absence of thorough environmental sampling in the area.  
454 However, we considered only environmental drivers that have been associated with *V. cholerae*  
455 environmental abundance or exposure to the environmental reservoir. Phytoplankton growth, indirectly  
456 measured through chlorophyll-a, has been associated with cholera outbreaks in several studies, and  
457 specifically cyanobacteria are a credible reservoir for *V. cholerae* (5,54). Water temperature influences  
458 phytoplankton growth (5), and the consequence of rainfall on environmental exposure and  
459 environmental contamination to/from *V. cholerae* is credible in this setting along a lake with low access

460 to water and sanitation infrastructures (33). We explicitly included a direct proxy of human presence,  
461 anthropogenic nighttime radiance, in the models considering seasonal mobility. Nighttime radiance is a  
462 reliable indicator of human presence and has been used to infer population mobility in both high and  
463 low-income countries (31,55,56). We are confident that we robustly captured the seasonal migration  
464 and the environmental components in our model, though there might be limitations in the  
465 spatiotemporal resolution and availability of remote sensing data, particularly for chlorophyll-a.

466 Impact assessments of cholera interventions are scarce in endemic settings, particularly beyond  
467 estimates of vaccine effectiveness and vaccine coverage. Studies like this one are crucial to guide  
468 cholera elimination. OCV and WASH improvements are core components of the toolbox to control or  
469 eliminate cholera. However, the value of OCV for reactive vaccination in epidemic settings has not been  
470 clear in areas with various patterns of endemicities. The assumption that most of the target population  
471 is susceptible becomes less accurate as transmission is increasingly environmentally driven. Reducing  
472 cholera transmission in endemic areas will require a location-specific understanding of the transmission  
473 routes to tailor a strategy; a “one size fits all” approach is unlikely to achieve satisfying results.

474 Geographically-coordinated strategies that target location-specific transmission dynamics might also be  
475 necessary to achieve regional cholera control.

476

## 477 **Acknowledgements**

478 We would like to acknowledge support and feedback from Nathan Wikle on statistical analyses.

479

## 480 **Data accessibility**

481 The code necessary to reproduce the analysis and the figures is available on

482 [https://github.com/bhartilab/cholera\\_kalemie](https://github.com/bhartilab/cholera_kalemie)

483 The data on weekly aggregated number of suspected cholera cases is owned by MSF-Epicentre and can

484 be requested by contacting Klaudia Porten ([Klaudia.PORTEN@epicentre.msf.org](mailto:Klaudia.PORTEN@epicentre.msf.org)).

485

## 486 **Funding**

487 This study was supported by the joint National Institutes of Health (NIH) – National Science Foundation

488 (NSF) - National Institute of Food and Agriculture (NIFA) Ecology and Evolution of Infectious Disease

489 (award R01TW012434 to NB), NSF DEB RAPID (award 2202872 to NB), and NSF DMS (award 2015273 to

490 EH). Funders had no role in the study design, data collection and analysis, decision to publish, or

491 preparation of the manuscript.

492

## 493 **Ethical considerations**

494 The Ethical Review Board of the University of Lubumbashi approved the study protocol to assess the

495 impact of the vaccination campaign (study protocol ethical number: UNILU/CEM/028/2013) and its

496 extension (study protocol ethical number: UNILU/CEM/050/2015). Individuals provided informed

497 consent to be part of the vaccine coverage survey. Pennsylvania State University's Institutional Review

498 Board determined the post-intervention handling and analyses of these anonymized data was not

499 Human Research (STUDY00015621).

500



## 501 **Authors' contributions**

502 FL, PEW, and DB designed the study to assess the impact of the intervention. AB and FL were involved in  
503 managing the data collection of the strengthened surveillance and checking data quality. AB, AW, EH,  
504 and NB developed the analytical plan of the additional analysis presented in this manuscript, and AB and  
505 AW did the analysis. AB and NB drafted the manuscript, and AW, PEW, DB, FL, and EH critically revised it.  
506 All authors gave final approval for publication and agree to be held accountable for the work performed  
507 therein.

508

## 509 **References**

- 510 1. Sow S, Antonio M, Oundo JO, Mandomando I, Ramamurthy T. Endemic and Epidemic Cholera in  
511 Africa. In: Ramamurthy T, Bhattacharya SK, editors. *Epidemiological and Molecular Aspects on*  
512 *Cholera* [Internet]. New York, NY: Springer; 2011 [cited 2022 Dec 1]. p. 31–50. (Infectious Disease).  
513 Available from: [https://doi.org/10.1007/978-1-60327-265-0\\_3](https://doi.org/10.1007/978-1-60327-265-0_3)
- 514 2. Ali M, Nelson AR, Lopez AL, Sack DA. Updated Global Burden of Cholera in Endemic Countries. *PLoS*  
515 *Negl Trop Dis*. 2015 Jun 4;9(6):e0003832.
- 516 3. Nelson EJ, Harris JB, Morris JG, Calderwood SB, Camilli A. Cholera transmission: the host, pathogen  
517 and bacteriophage dynamic. *Nat Rev Microbiol* [Internet]. 2009 Oct [cited 2020 Apr 8];7(10).  
518 Available from: <https://www.ncbi.nlm.nih.gov/pmc/articles/PMC3842031/>
- 519 4. Harris JB, LaRocque RC, Qadri F, Ryan ET, Calderwood SB. Cholera. *The Lancet*. 2012 Jun  
520 30;379(9835):2466–76.
- 521 5. Islam MS, Zaman MH, Islam MS, Ahmed N, Clemens JD. Environmental reservoirs of *Vibrio cholerae*.  
522 *Vaccine*. 2020 Feb 29;38:A52–62.
- 523 6. Jutla A, Whitcombe E, Hasan N, Haley B, Akanda A, Huq A, et al. Environmental Factors Influencing  
524 Epidemic Cholera. *Am J Trop Med Hyg*. 2013 Sep 4;89(3):597–607.
- 525 7. Vezzulli L, Pruzzo C, Huq A, Colwell RR. Environmental reservoirs of *Vibrio cholerae* and their role in  
526 cholera. *Environ Microbiol Rep*. 2010 Feb;2(1):27–33.
- 527 8. Zerbo A, Castro Delgado R, González PA. A review of the risk of cholera outbreaks and urbanization  
528 in sub-Saharan Africa. *J Biosaf Biosecurity*. 2020 Dec 1;2(2):71–6.
- 529 9. Frerichs RR, Keim PS, Barrais R, Piarroux R. Nepalese origin of cholera epidemic in Haiti. *Clin*  
530 *Microbiol Infect Off Publ Eur Soc Clin Microbiol Infect Dis*. 2012 Jun;18(6):E158-163.

- 531 10. Organization WH. Ending cholera a global roadmap to 2030. In: Ending cholera a global roadmap to  
532 2030. 2017. p. 32–32.
- 533 11. Waldman RJ, Mintz ED, Papowitz HE. The Cure for Cholera — Improving Access to Safe Water and  
534 Sanitation. *N Engl J Med*. 2013 Feb 14;368(7):592–4.
- 535 12. Luby SP, Davis J, Brown RR, Gorelick SM, Wong THF. Broad approaches to cholera control in Asia:  
536 Water, sanitation and handwashing. *Vaccine*. 2020 Feb 29;38:A110–7.
- 537 13. Montgomery M, Jones MW, Kabole I, Johnston R, Gordon B. No end to cholera without basic water,  
538 sanitation and hygiene. *Bull World Health Organ*. 2018 Jun 1;96(6):371-371A.
- 539 14. Organization WH. Progress on household drinking water, sanitation and hygiene 2000-2017: special  
540 focus on inequalities. World Health Organization; 2019.
- 541 15. Luquero FJ, Grout L, Ciglenecki I, Sakoba K, Traore B, Heile M, et al. Use of *Vibrio cholerae* vaccine in  
542 an outbreak in Guinea. *N Engl J Med*. 2014 May 29;370(22):2111–20.
- 543 16. Mukandavire Z, Morris JG. Modeling the Epidemiology of Cholera to Prevent Disease Transmission  
544 in Developing Countries. *Microbiol Spectr*. 2015 Jun 19;3(3):3.3.21.
- 545 17. World Health Organization. Cholera vaccine: WHO position paper, August 2017 –  
546 Recommendations. *Vaccine*. 2018 Jun 7;36(24):3418–20.
- 547 18. Pezzoli L. Global oral cholera vaccine use, 2013–2018. *Vaccine*. 2020 Feb;38:A132–40.
- 548 19. Shaikh H, Lynch J, Kim J, Excler JL. Current and future cholera vaccines. *Vaccine*. 2020 Feb  
549 29;38:A118–26.
- 550 20. Finger F, Bertuzzo E, Luquero FJ, Naibei N, Touré B, Allan M, et al. The potential impact of case-area  
551 targeted interventions in response to cholera outbreaks: A modeling study. *PLOS Med*. 2018 Feb  
552 27;15(2):e1002509.
- 553 21. Leung T, Eaton J, Matrajt L. Optimizing one-dose and two-dose cholera vaccine allocation in  
554 outbreak settings: A modeling study. *PLoS Negl Trop Dis*. 2022 Apr 20;16(4):e0010358.
- 555 22. Congo Democratic Republic DHS, 2013-14 - Final Report (French).
- 556 23. Bompangue Nkoko D, Giraudoux P, Plisnier PD, Tinda AM, Piarroux M, Sudre B, et al. Dynamics of  
557 cholera outbreaks in Great Lakes region of Africa, 1978-2008. *Emerg Infect Dis*. 2011  
558 Nov;17(11):2026–34.
- 559 24. Massing LA, Aboubakar S, Blake A, Page AL, Cohuet S, Ngandwe A, et al. Highly targeted cholera  
560 vaccination campaigns in urban setting are feasible: The experience in Kalemie, Democratic Republic  
561 of Congo. *PLoS Negl Trop Dis*. 2018 May 7;12(5):e0006369.
- 562 25. Kayembe HCN, Bompangue D, Linard C, Muwonga J, Moutschen M, Situakibanza H, et al. Modalities  
563 and preferred routes of geographic spread of cholera from endemic areas in eastern Democratic  
564 Republic of the Congo. *PLOS ONE*. 2022 Feb 7;17(2):e0263160.

- 565 26. Akman O, Corby MR, Schaefer E. Examination of models for cholera: Lett Biomath. 2016 Dec  
566 1;3(1):93-118-93–118.
- 567 27. Ferreras E, Chizema-Kawesha E, Blake A, Chewe O, Mwaba J, Zulu G, et al. Single-Dose Cholera  
568 Vaccine in Response to an Outbreak in Zambia. *N Engl J Med*. 2018 08;378(6):577–9.
- 569 28. Holmgren J. An Update on Cholera Immunity and Current and Future Cholera Vaccines. *Trop Med  
570 Infect Dis*. 2021 Jun;6(2):64.
- 571 29. Harris JB. Cholera: Immunity and Prospects in Vaccine Development. *J Infect Dis*. 2018 Oct  
572 15;218(suppl\_3):S141–6.
- 573 30. Elvidge CD, Baugh K, Zhizhin M, Hsu FC, Ghosh T. VIIRS night-time lights. *Int J Remote Sens*. 2017  
574 Nov 2;38(21):5860–79.
- 575 31. Bharti N, Tatem AJ, Ferrari MJ, Grais RF, Djibo A, Grenfell BT. Explaining Seasonal Fluctuations of  
576 Measles in Niger Using Nighttime Lights Imagery. *Science*. 2011 Dec 9;334(6061):1424–7.
- 577 32. MODIS-Aqua M. NASA goddard space flight center, ocean ecology laboratory, ocean biology  
578 processing group. Moderate-Resolut Imaging Spectroradiometer MODIS Aqua L0 Data NASA OB  
579 DAAC Greenbelt MD USA. 2018;
- 580 33. Lemaitre J, Pasetto D, Perez-Saez J, Sciarra C, Wamala JF, Rinaldo A. Rainfall as a driver of epidemic  
581 cholera: Comparative model assessments of the effect of intra-seasonal precipitation events. *Acta  
582 Trop*. 2019 Feb 1;190:235–43.
- 583 34. Sheffield J, Goteti G, Wood EF. Development of a 50-Year High-Resolution Global Dataset of  
584 Meteorological Forcings for Land Surface Modeling. *J Clim*. 2006 Jul 1;19(13):3088–111.
- 585 35. Watanabe S, Opper M. Asymptotic equivalence of Bayes cross validation and widely applicable  
586 information criterion in singular learning theory. *J Mach Learn Res*. 2010;11(12).
- 587 36. Leung T, Matrajt L. Protection afforded by previous *Vibrio cholerae* infection against subsequent  
588 disease and infection: A review. *PLoS Negl Trop Dis*. 2021 May 20;15(5):e0009383.
- 589 37. Azman AS, Lauer SA, Bhuiyan TR, Luquero FJ, Leung DT, Hegde ST, et al. *Vibrio cholerae* O1  
590 transmission in Bangladesh: insights from a nationally representative serosurvey. *Lancet Microbe*.  
591 2020 Dec 1;1(8):e336–43.
- 592 38. Jeandron A, Saidi JM, Kapama A, Burhole M, Birembano F, Vandeveld T, et al. Water Supply  
593 Interruptions and Suspected Cholera Incidence: A Time-Series Regression in the Democratic  
594 Republic of the Congo. Brocklehurst C, editor. *PLOS Med*. 2015 Oct 27;12(10):e1001893.
- 595 39. Reiner RC, Graetz N, Casey DC, Troeger C, Garcia GM, Mosser JF, et al. Variation in Childhood  
596 Diarrheal Morbidity and Mortality in Africa, 2000–2015. *N Engl J Med*. 2018 Sep 20;379(12):1128–  
597 38.
- 598 40. THE 17 GOALS | Sustainable Development [Internet]. [cited 2022 Dec 13]. Available from:  
599 <https://sdgs.un.org/goals>

- 600 41. Cash BA, Rodó X, Emch M, Yunus M, Faruque ASG, Pascual M. Cholera and Shigellosis: Different  
601 Epidemiology but Similar Responses to Climate Variability. *PLOS ONE*. 2014 Sep 17;9(9):e107223.
- 602 42. Shackleton D, Memon FA, Nichols G, Phalkey R, Chen AS. Mechanisms of cholera transmission via  
603 environment in India and Bangladesh: state of the science review. *Rev Environ Health* [Internet].  
604 2023 Jan 16 [cited 2023 Jun 23]; Available from:  
605 <https://www.degruyter.com/document/doi/10.1515/reveh-2022-0201/html>
- 606 43. Vezzulli L, Oliveri C, Borello A, Gregory L, Kimirei I, Brunetta M, et al. Aquatic reservoir of *Vibrio*  
607 *cholerae* in an African Great Lake assessed by large scale plankton sampling and ultrasensitive  
608 molecular methods. *ISME Commun*. 2021 Jun 7;1(1):1–4.
- 609 44. Hounmanou YMG, Njamkepo E, Rauzier J, Gallandat K, Jeandron A, Kamwiziku G, et al. Genomic  
610 Microevolution of *Vibrio cholerae* O1, Lake Tanganyika Basin, Africa - Volume 29, Number 1—  
611 January 2023 - *Emerging Infectious Diseases journal* - CDC. [cited 2023 Apr 13]; Available from:  
612 [https://wwwnc.cdc.gov/eid/article/29/1/22-0641\\_article](https://wwwnc.cdc.gov/eid/article/29/1/22-0641_article)
- 613 45. Michael M. Detection and antibiotic susceptibility of *vibrio cholerae* In *oreochromis tanganicae*  
614 (*Tilapia*) and water in Lake Tanganyika, Kigoma-Tanzania [Internet] [Thesis]. Sokoine University of  
615 Agriculture; 2019 [cited 2023 Apr 13]. Available from:  
616 <http://www.suaire.sua.ac.tz/handle/123456789/3905>
- 617 46. Nyambuli S. Prevalence, pathogenic markers and antibiotic susceptibility of *Vibrio cholerae* in  
618 sardines, water and phytoplankton in lake Tanganyika, Tanzania. Sokoine University of Agriculture;  
619 2017.
- 620 47. Codeço CT. Endemic and epidemic dynamics of cholera: the role of the aquatic reservoir. *BMC Infect*  
621 *Dis*. 2001 Feb 2;1(1):1.
- 622 48. Pasetto D, Finger F, Camacho A, Grandesso F, Cohuet S, Lemaitre JC, et al. Near real-time  
623 forecasting for cholera decision making in Haiti after Hurricane Matthew. *PLOS Comput Biol*. 2018  
624 May 16;14(5):e1006127.
- 625 49. Yang C, Wang J. On the intrinsic dynamics of bacteria in waterborne infections. *Math Biosci*. 2018  
626 Feb 1;296:71–81.
- 627 50. Morof D, Cookson ST, Laver S, Chirundu D, Desai S, Mathenge P, et al. Community Mortality from  
628 Cholera: Urban and Rural Districts in Zimbabwe. *Am J Trop Med Hyg*. 2013 Apr 3;88(4):645–50.
- 629 51. Alam MM, Riyadh MA, Fatema K, Rahman MA, Akhtar N, Ahmed T, et al. Antigen-Specific Memory  
630 B-Cell Responses in Bangladeshi Adults after One- or Two-Dose Oral Killed Cholera Vaccination and  
631 Comparison with Responses in Patients with Naturally Acquired Cholera. *Clin Vaccine Immunol*.  
632 2011 May;18(5):844–50.
- 633 52. Franke MF, Ternier R, Jerome JG, Matias WR, Harris JB, Ivers LC. Long-term effectiveness of one and  
634 two doses of a killed, bivalent, whole-cell oral cholera vaccine in Haiti: an extended case-control  
635 study. *Lancet Glob Health*. 2018 Sep 1;6(9):e1028–35.

- 636 53. ALMAGRO-MORENO S, TAYLOR RK. Cholera: Environmental Reservoirs and Impact on Disease  
637 Transmission. *Microbiol Spectr* [Internet]. 2013 Dec [cited 2021 May 6];1(2). Available from:  
638 <https://www.ncbi.nlm.nih.gov/pmc/articles/PMC4321695/>
- 639 54. Constantin de Magny G, Murtugudde R, Sapiano MRP, Nizam A, Brown CW, Busalacchi AJ, et al.  
640 Environmental signatures associated with cholera epidemics. *Proc Natl Acad Sci*. 2008 Nov  
641 18;105(46):17676–81.
- 642 55. Stathakis D, Baltas P. Seasonal population estimates based on night-time lights. *Comput Environ*  
643 *Urban Syst*. 2018 Mar 1;68:133–41.
- 644 56. Bharti N, Tatem AJ. Fluctuations in anthropogenic nighttime lights from satellite imagery for five  
645 cities in Niger and Nigeria. *Sci Data* [Internet]. 2018 Nov 13 [cited 2019 Jul 30];5. Available from:  
646 <https://www.ncbi.nlm.nih.gov/pmc/articles/PMC6233255/>
- 647
